# Supplementary material
Source: PubMed Central journal article supplement (PMC4331075)

### **Supplementary figure captions**

**Suppl. Fig. S1** Hepatocytes cultured on a spot containing mixture of HGF and TGF- $\beta$ 1.

(A) Both spheroids and spindle-shaped morphology were observed after 5 days in culture of HGF and TGF- $\beta$ 1 containing spots. (B) Hepatocytes on HGF+ TGF- $\beta$ 1/collagen (I) secrete more albumin than TGF- $\beta$ 1/collagen (I), indicating that HGF helps to protect hepatocytes from the effects of TGF- $\beta$ 1.

**Suppl. Fig. S2** Dose-dependent influence of immobilized HGF on albumin synthesis.

Primary hepatocytes were cultured for 4 days on different concentration of HGF mixed with collagen I. The data indicates means  $\pm$  SD (n=3 samples).

**Suppl. Fig. S3** Functional test of primary hepatocytes cultured on HGF and TGF- $\beta$ 1 microarrays. Urea secretion of hepatocytes by ELISA yielded results similar to those of albumin production. The data indicates means  $\pm$  SD (n=3 samples). \**p*-value < 0.05.

**Suppl. Fig. S4** TGF- $\beta$ 1 inhibitor can enhance the epithelial phenotype in hepatocytes.

The influence of TGF- $\beta$ 1 inhibitor (SB431542) on rat primary hepatocytes cultured on collagen I spot containing HGF and TGF- $\beta$ 1 was monitored at varying distances (center to center distance: 0.7 mm and 1.5 mm). (A) The immunostaining images showing the higher expression of epithelial cell marker (E-cadherin and albumin) and lower expression of mesenchymal marker (N-cadherin) in cells cultured on both HGF and TGF- $\beta$ 1 spots in presence of SB431542. Scale bar: 100  $\mu$ m. (B,C) The fluorescence intensity of E-cadherin and N-cadherin was quantified using imageJ software and normalized with their DAPI intensity. For the control, the center to center distance

between spots is 1.5 mm. Data are mean  $\pm$  SD, n=3.

## Supplementary figures

### Suppl. Fig. S1

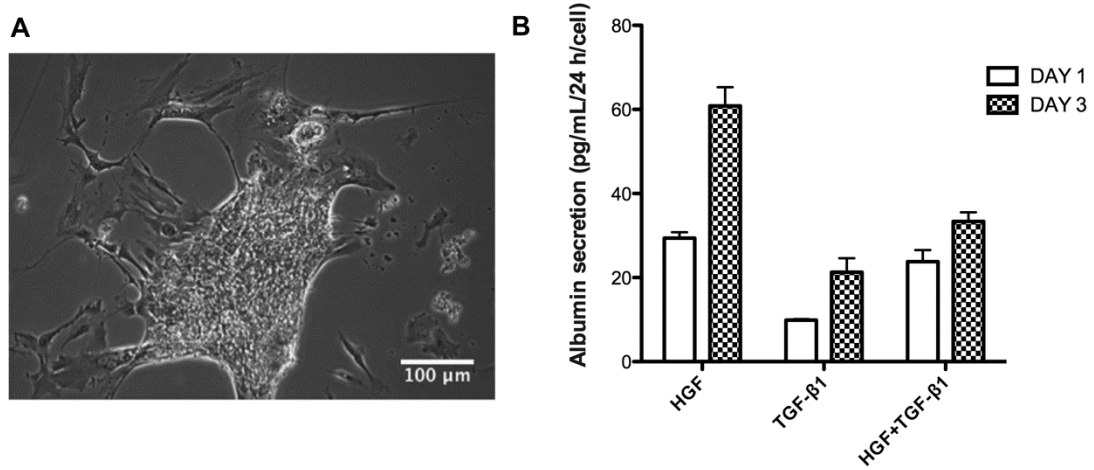

### Suppl. Fig. S2

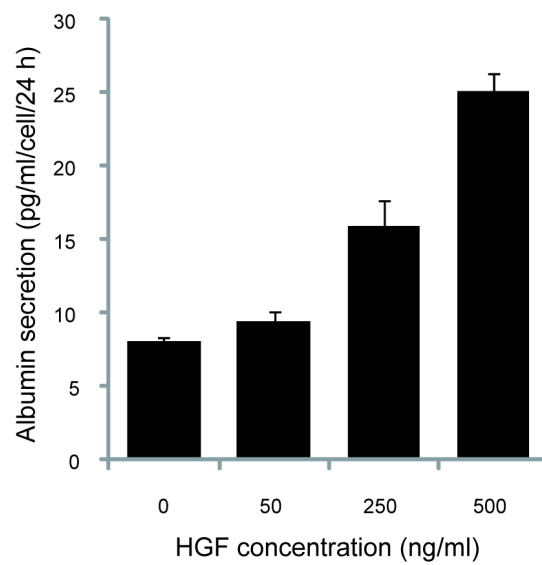

Suppl. Fig. S3

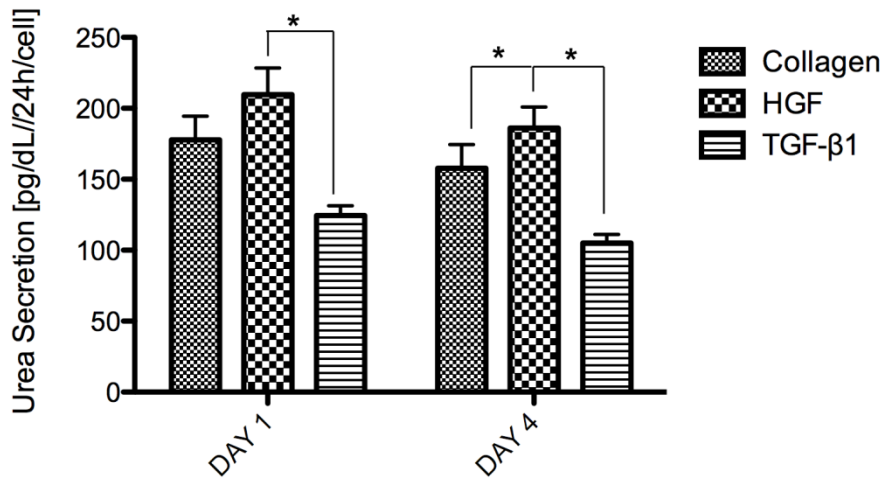

Suppl. Fig. S4

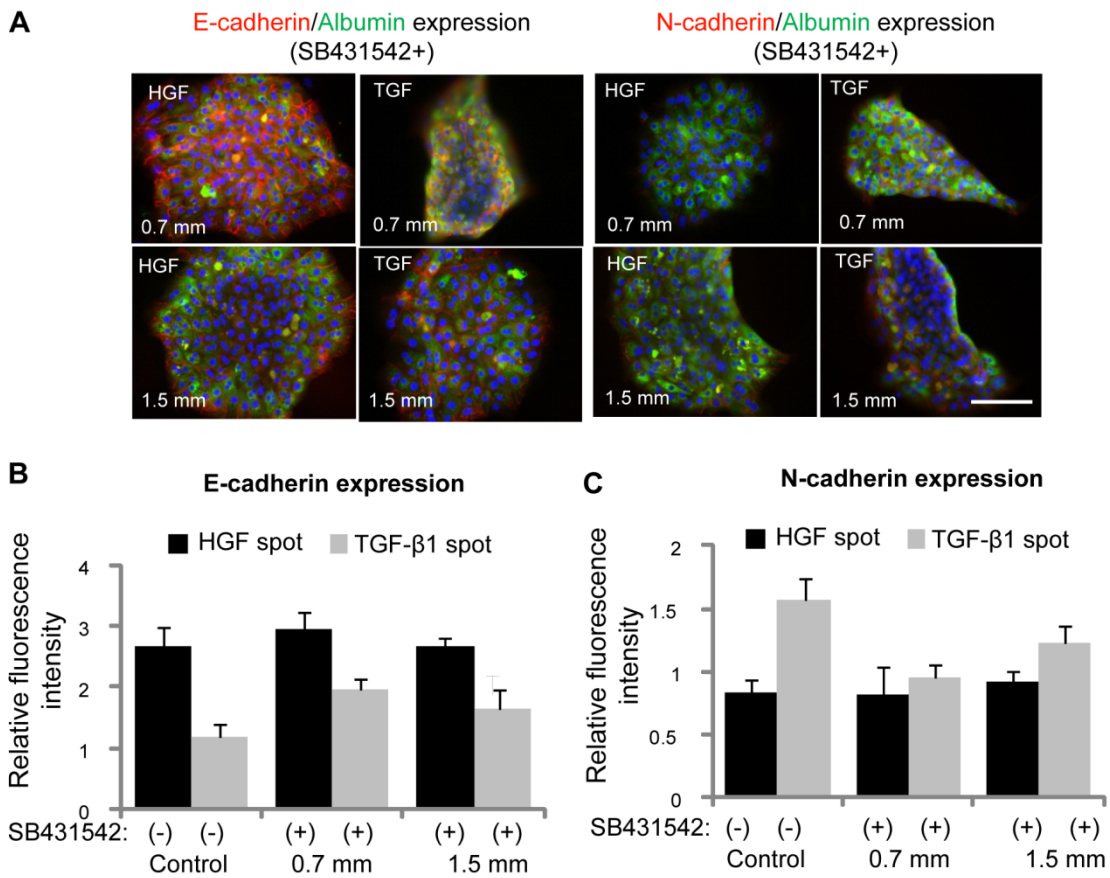

Supplement: NIHMS544932-supplement-ESI.pdf [file NIHMS544932-supplement-ESI.pdf]
